# Small Heat Shock Protein $\alpha$ A-Crystallin Prevents Photoreceptor Degeneration in Experimental Autoimmune Uveitis

Narsing A. Rao<sup>1\*</sup>, Sindhu Saraswathy<sup>1</sup>, Geeta Pararajasegaram<sup>1</sup>, Suraj P. Bhat<sup>2</sup>

**1** Doheny Eye Institute, University of Southern California, Los Angeles, California, United States of America, **2** Jules Stein Eye Institute, Brain Research Institute and Molecular Biology Institute, University of California Los Angeles, Los Angeles, United States of America

## Abstract

The small heat shock protein,  $\alpha$ A-crystallin null ( $\alpha$ A<sup>-/-</sup>) mice are known to be more prone to retinal degeneration than the wild type mice in Experimental Autoimmune Uveoretinitis (EAU). In this report we demonstrate that intravenous administration of  $\alpha$ A preserves retinal architecture and prevents photoreceptor damage in EAU. Interestingly, only  $\alpha$ A and not  $\alpha$ B-crystallin ( $\alpha$ B), a closely related small heat shock protein works, pointing to molecular specificity in the observed retinal protection. The possible involvement of  $\alpha$ A in retinal protection through immune modulation is corroborated by adoptive transfer experiments, (employing  $\alpha$ A<sup>-/-</sup> and wild type mice with EAU as donors and Rag2<sup>-/-</sup> as the recipient mice), which indicate that  $\alpha$ A protects against the autoimmune challenge by modulating the systemic B and T cell immunity. We show that  $\alpha$ A administration causes marked reduction in Th1 cytokines (TNF- $\alpha$ , IL-12 and IFN- $\gamma$ ), both in the retina and in the spleen; notably, IL-17 was only reduced in the retina suggesting local intervention. Importantly, expression of Toll-like receptors and their associated adaptors is also inhibited suggesting that  $\alpha$ A protection, against photoreceptor loss in EAU, is associated with systemic suppression of both the adaptive and innate immune responses.

**Citation:** Rao NA, Saraswathy S, Pararajasegaram G, Bhat SP (2012) Small Heat Shock Protein  $\alpha$ A-Crystallin Prevents Photoreceptor Degeneration in Experimental Autoimmune Uveitis. PLoS ONE 7(3): e33582. doi:10.1371/journal.pone.0033582

**Editor:** Lucia Gabriele, Istituto Superiore di Sanità, Italy

**Received:** September 23, 2011; **Accepted:** February 15, 2012; **Published:** March 30, 2012

**Copyright:** © 2012 Rao et al. This is an open-access article distributed under the terms of the Creative Commons Attribution License, which permits unrestricted use, distribution, and reproduction in any medium, provided the original author and source are credited.

**Funding:** This work was supported in part by grants E Y017347, EY019506 and EY03040 to (NR) and EY06044 (to SB) from the National Institutes of Health, Bethesda, Maryland; and by a grant from Research to Prevent Blindness, Inc., New York, New York. The funders had no role in study design, data collection and analysis, decision to publish, or preparation of the manuscript.

**Competing Interests:** The authors have declared that no competing interests exist.

\* E-mail: nrao@usc.edu

## Introduction

Autoimmune Uveoretinitis leads to irreversible loss of vision due to degeneration of the photoreceptor neurons in the retina. The photoreceptor degeneration in uveitis is seen as a culmination of the inflammatory cascade that involves T-cell mediated adaptive immune response [1,2,3]. The rodent EAU model [4] presents a clinically relevant paradigm for a phenotypic assessment of various gene products whose expression attends the inflammatory cascade that leads to blindness through degeneration of photoreceptor neurons. In mice availability of various genetic knockouts provides additional tools for the assessment of the relevance of specific gene products in inflammation as well as in understanding their possible utility in therapeutic intervention.

Among the gene products that are differentially expressed in EAU in mice the small heat shock protein,  $\alpha$ A-crystallin ( $\alpha$ A) shows significantly elevated expression in the inner segments of photoreceptor neurons, the site of oxidative damage in the retina. This increased expression of  $\alpha$ A was associated with the protection of photoreceptor neurons in the retina [5]. At the cellular level these data fit well into known anti-apoptotic activity of this small heat shock protein in cultured cells [6], however it does not illuminate the relationship of  $\alpha$ A, if any, to the immune status of the animal and/or the pathology of the eye with autoimmune retinitis. In this report using  $\alpha$ A null ( $-/-$ ) [7] and wild type (WT) mice we have examined the effect of intravenous administration of

$\alpha$ A on retinal integrity and investigated the status of various immune modulators associated with the protection of photoreceptor neurons in EAU.

## Results and Discussion

Small heat shock proteins have been suggested to be neuroprotective [8]. Masilmoni et al., first reported that intraperitoneal administration of  $\alpha$ -crystallin (a mixture of two small heat shock proteins,  $\alpha$ A and  $\alpha$ B proteins) affords protection against silver nitrate induced inflammation in rats [9,10,11]. Interestingly, intravenous injections of  $\alpha$ B in mice have been shown to ameliorate the MS symptoms [12].  $\alpha$ B is the major gene product expressed at high levels in multiple sclerosis [13] and other neurodegenerative disease including Alzheimer's disease [14]. The  $\alpha$ B gene (*Cryab*) contains a canonical heat shock promoter [15] and therefore much against the prevailing status of the expression of stress proteins and their association with neurodegenerative diseases [8,14], it was surprising to find that in EAU, in mice, it was not  $\alpha$ B that showed increased expression but its very close relative, the  $\alpha$ A [5].

Autoimmune Uveitis is a disease that is restricted to the visual system, but its management has focused mostly on systemic suppression of the immune system responses [16]. In view of this background we investigated the effect of intravenous administration of  $\alpha$ A protein on retinal integrity and photoreceptor

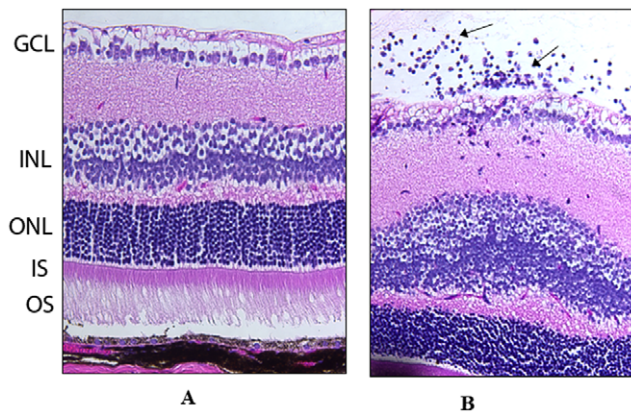

**Figure 1.  $\alpha$ A administration protects retinal phenotype in  $\alpha$ A $^{-/-}$  mice in EAU.** Prevention of inflammation by intravenous administration of  $\alpha$ A crystalline protein in  $\alpha$ A $^{-/-}$  mice with EAU on day 14 post immunization (A) whereas in the untreated  $\alpha$ A $^{-/-}$  mice with EAU (B), there was inflammatory cell infiltration (arrows) and retinal damage. GCL = Ganglion cell layer, INL = Inner nuclear layer, ONL = Outer nuclear layer, IS = inner segments, OS = outer segments. Magnification: 400 $\times$ . doi:10.1371/journal.pone.0033582.g001

degeneration in  $\alpha$ A null ( $^{-/-}$ ) and wild type (WT) mice upon immune challenge in EAU. We also followed the attendant immune response(s) by assessing the relevant gene activity encompassing cytokines and innate immune response.

Intravenous administration of  $\alpha$ A selectively protects retina in  $\alpha$ A $^{-/-}$  mice against autoimmune induced inflammation and cell death in EAU (Fig. 1). This remarkable protection of the retinal phenotype in  $\alpha$ A $^{-/-}$  EAU mice points to the importance of this small heat shock protein in the maintenance of the immune health in the mouse. This protection against inflammatory incursions and retinal degeneration is also evident in WT type mice. Well-preserved photoreceptors are seen in WT mice with EAU treated with  $\alpha$ A (Fig. 2A and B). Among other crystallins, only  $\beta$ -crystallin treated animals showed some visible protection (Fig. 2A and B, compare  $\alpha$ A with  $\beta$ -crystallins,  $\alpha$ B and  $\gamma$  and saline control). In  $\alpha$ A treated EAU animals retinal integrity is maintained as corroborated by the measurement of retinal thicknesses, which were significantly higher in  $\alpha$ A treated than in  $\alpha$ B,  $\gamma$ -crystallin and saline treated animals ( $p < 0.001$ ) (see Table S1). Notably, these retinas also showed absence of apoptotic cells (Fig. 2C) in animals treated with  $\alpha$ A, an observation that is in accord with the known anti-apoptotic properties [6] and increased expression of  $\alpha$ A in the EAU retina [5].

It is important to note that the photoreceptor protection is protein-specific (Fig. 2). Out of the two  $\alpha$ -crystallins it is only  $\alpha$ A, which protects retina. This data is highly significant because it points to existence of differential modes of mechanistic intervention by two closely related small heat shock proteins.  $\alpha$ A and  $\alpha$ B are highly conserved small heat shock proteins, which share 58% sequence similarity (for review see [14]). Additionally, it is interesting to note that among these two  $\alpha$ -crystallins ( $\alpha$ A and  $\alpha$ B) only  $\alpha$ A is detected in the spleen and thymus, while both of them are expressed in the retina [17,18]. Both of these small heat shock proteins have been shown to be anti-apoptotic [6], however, it is only  $\alpha$ A that is elevated in EAU [5]. It is, therefore, noteworthy that high levels of  $\alpha$ A, expressed in the retina during the inflammatory response, are localized to the inner segments of the photoreceptor neurons where pathological oxidative stress predominates in EAU [5,19].

In considering the induction of the expression of the two  $\alpha$ -crystallins ( $\alpha$ A and  $\alpha$ B) it is important to consider that these two gene products are differentially regulated. The promoter architecture of the two genes is different [14]. It is the  $\alpha$ B gene that contains a canonical heat shock promoter [15] and would have been expected to be induced under apparent "pathological stress" yet it is the expression of  $\alpha$ A gene, which lacks a recognizable stress promoter that is elevated. These observations suggest a non-conventional and physiologically-specific mechanism of stress protein regulation in EAU.

In order to investigate the role of  $\alpha$ A in photoreceptor protection and its possible relationship to immune mechanisms operative in EAU we conducted adoptive transfer experiments employing the  $\alpha$ A null [7] and Rag2 $^{-/-}$  mice (devoid of T and B cells). EAU was induced in  $\alpha$ A $^{-/-}$  mice with Interphotoreceptor Retinol-binding protein (IRBP) peptide and reactive splenocytes and lymphocytes from these mice were then injected into Rag2 $^{-/-}$  mice. Infiltration of inflammatory cells was seen in the retinas of Rag2 $^{-/-}$  mice on day eleven after transfer (Fig. 3), a feature that is characteristic of early autoimmune uveitis [4,5]. This transfer eventually leads to severe retinal degeneration in Rag2 $^{-/-}$  mice compared to the retina of Rag2 $^{-/-}$  mice transferred with the splenocytes and lymphocytes derived from wild type (WT) mice with EAU (Fig. 3). These data indicate that absence of  $\alpha$ A increases the effectiveness of reactive splenocytes and lymphocytes in this paradigm, which essentially tests the potency of the adaptive immune network. As indicated above, EAU in rodents is known to be a T cell-dependent immune process that involves Th1 and/or TH17 effectors [1,4,20] but this does not preclude the requirement of a robust initial innate immune response [1]. It is possible that  $\alpha$ A presence modifies the initial innate immune response that may impact the ensuing adaptive immune response that has an immunosuppressive phenotype as initially reported for hsp10 [21].

The innate immune response that culminates in T cell-mediated inflammatory process is heralded when bacterial components present in CFA are recognized by Toll like receptors (TLRs) [22,23,24]. We, therefore, evaluated cytokine gene expression in spleen and retina in the context of our investigation in wild type (WT) mice with EAU,  $\alpha$ A $^{-/-}$  mice with EAU and  $\alpha$ A $^{-/-}$  mice with EAU treated with intravenous  $\alpha$ A. We have previously shown that  $\alpha$ A $^{-/-}$  EAU mice in comparison to WT EAU mice show early inflammatory response and apoptosis in the retina and present with significant inflammation in the uvea on day 18 after immunization [5]. There are early signs of inflammatory cell infiltration in  $\alpha$ A $^{-/-}$  mice with EAU but not in the retina of  $\alpha$ A $^{-/-}$  mice treated with  $\alpha$ A (see Fig. 1) RT-PCR analyses of the gene expression of various cytokines in the retina and the spleen is even more informative. Intravenous administration of  $\alpha$ A neutralized all induced cytokine gene expression (TNF- $\alpha$ , IL-12 and IFN  $\gamma$ ), both locally (in the retina) as well as in the spleen (Fig. 4, A and B and Table S2). Multi analyte ELISA array analysis showed that the Th1 cytokines IL-2, IL-12, IFN- $\gamma$  and TNF- $\alpha$  were significantly down-regulated in the retina upon  $\alpha$ A protein administration to  $\alpha$ A $^{-/-}$  mice with EAU (Fig. 5 and Table S3).

IL17 is known to play a role in the severity of inflammation in EAU [25]. The concentrations of Th17 cytokines IL-6, IL-17, IL-23 and TGF- $\beta$  were also lowered in  $\alpha$ A treated mice (retinas), whereas the Th2 cytokines, IL-4 and IL-10 were elevated (Fig. 5). While it is interesting to note the elevation of IL12, a cytokine involved in enhancing TH1 responses [26], the data on IL17 stands out; its expression was elevated only in the retina of the  $\alpha$ A $^{-/-}$  mice; there was no significant change in expression in the

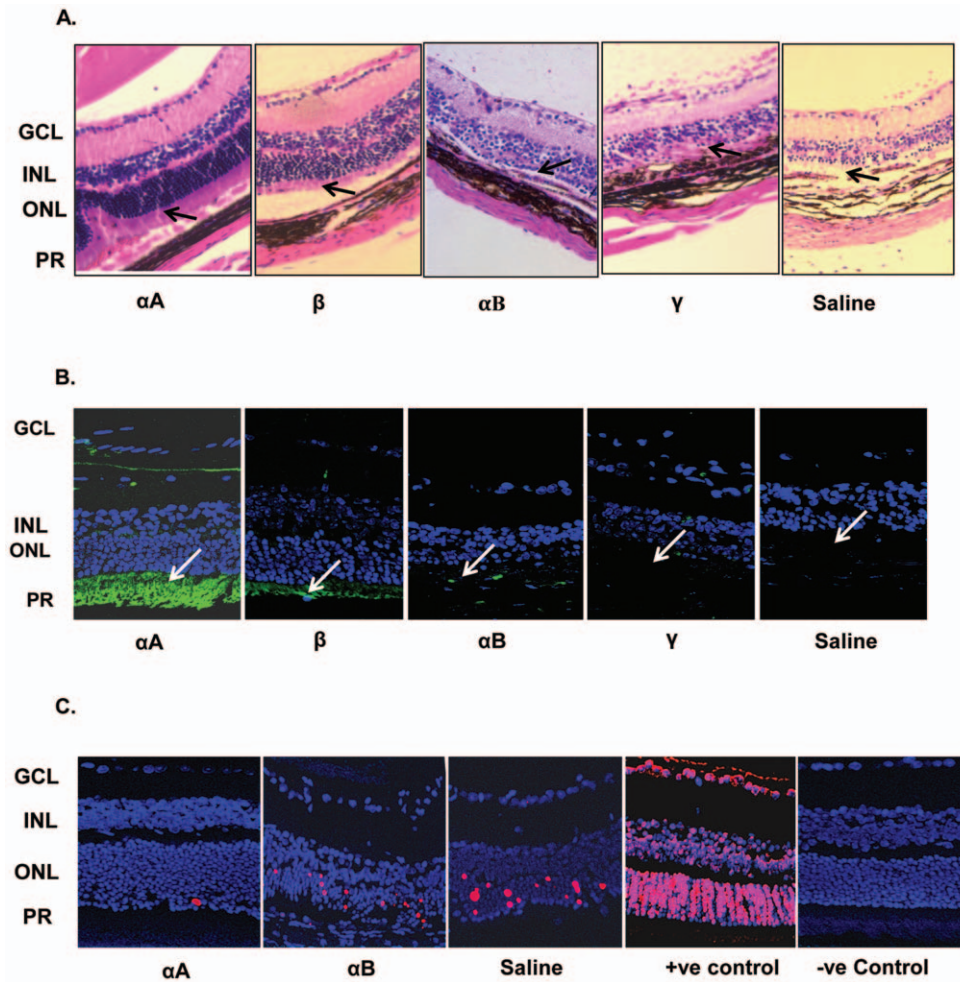

**Figure 2. Intravenous administration of  $\alpha$ A protects retinal photoreceptors.** Twelve days after EAU was induced in B10RIII (WT) mice with an IRBP peptide, the animals were injected with various crystallins and the retinas were collected and examined on day 21. **A, B and C:**  $\alpha$ A =  $\alpha$ A crystallin,  $\beta$  =  $\beta$  crystallin,  $\alpha$ B =  $\alpha$ B crystallin,  $\gamma$  =  $\gamma$  crystallin and saline. **A.** Histology of retina and uvea (Hematoxylin and Eosin stained). Arrows indicate photoreceptor inner segments (PR). Note presence of photoreceptors in  $\alpha$ A and their degeneration (absence) in Saline treated animals. **B.** Retinal architecture as revealed by immunostaining for IRBP with anti-IRBP (green, arrows). **C.** Apoptosis in EAU retinas of animals treated with various crystallins;  $\alpha$ A treated,  $\alpha$ B treated, saline treated, positive (+ve) control (DNase I treated retina) and ('no enzyme') negative (-ve) control. Note that retinal photoreceptors are preserved (**A**,  $\alpha$ A and **B**,  $\alpha$ A); there is little or no apoptosis (TUNEL positive cells) in  $\alpha$ A treated animals (**C**,  $\alpha$ A). PR = Photoreceptors, ONL = Outer nuclear layer, INL = Inner nuclear layer, GCL = Ganglion cell layer. doi:10.1371/journal.pone.0033582.g002

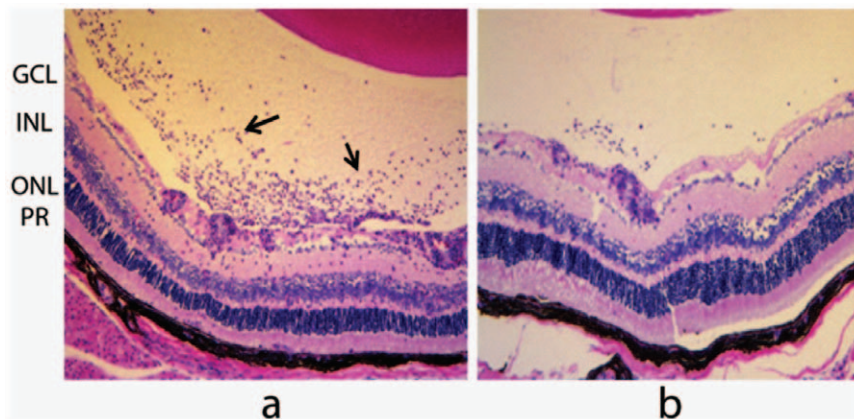

**Figure 3. Adaptive transfer demonstrates involvement of  $\alpha$ A with immune regulation.** Inflammatory cell infiltration is a hallmark of the progression in EAU. Note inflammatory cells (arrows) in the vitreous in (a) representing the status of early retina in Rag2<sup>-/-</sup> mice injected with splenocytes and lymphocytes from  $\alpha$ A<sup>-/-</sup> mice with EAU. Note the relative absence of this infiltration in b, which represents the status of retina in Rag2<sup>-/-</sup> mice injected with splenocytes and lymphocytes derived from the wild type mice (129Sve) with EAU. PR = Photoreceptors, ONL = Outer nuclear layer, INL = Inner nuclear layer, GCL = Ganglion Cell layer. doi:10.1371/journal.pone.0033582.g003

spleen of these mice (Fig. 3B) and corresponding WT animals with EAU (compare Figures 4A and 4B, IL-17). Importantly, administration of  $\alpha$ A to  $\alpha$ A $^{-/-}$  EAU mice inhibits IL17 increase in the retinas of these animals (Fig. 4A). These observations prompt the conclusion that  $\alpha$ A administration may impact the retina in a more specific fashion where marked elevation of this cytokine (IL17) occurs during early phase of EAU development [25]. This conclusion is supported by observations that IL-17 $^{-/-}$  mice show known reduced inflammation in EAU [27] and the recent report on the amelioration of the severity of EAU by all-trans retinoic acid, which inhibits the emergence of the IL17 producing Th17 cells [28]. In light of this data an investigation into a molecular

mechanistic link direct or indirect (via Th17 cells) between  $\alpha$ A and IL17 expression will be rewarding.

We next evaluated the impact of  $\alpha$ A administration on the expression of Toll-like receptors (TLRs) and their associated adaptor gene products. We used commercially available PCR based arrays of genes involved in innate immune response (Fig. 6).  $\alpha$ A administration results in 3 to 31 fold down regulation in TLRs 1–9; adaptors MyD88, Irak1, CD14, Tirap; and NF $\kappa$ B related genes including Ccl2, IFN- $\gamma$ , NF $\kappa$ B, TNF- $\alpha$  and TNF- $\alpha$  receptors. This systemic down regulation suggests a response that may lead to a dampening of the innate immune response [3,29,30,31] (Fig. 6). In the context of increased  $\alpha$ A expression, the modulation of the TLRs

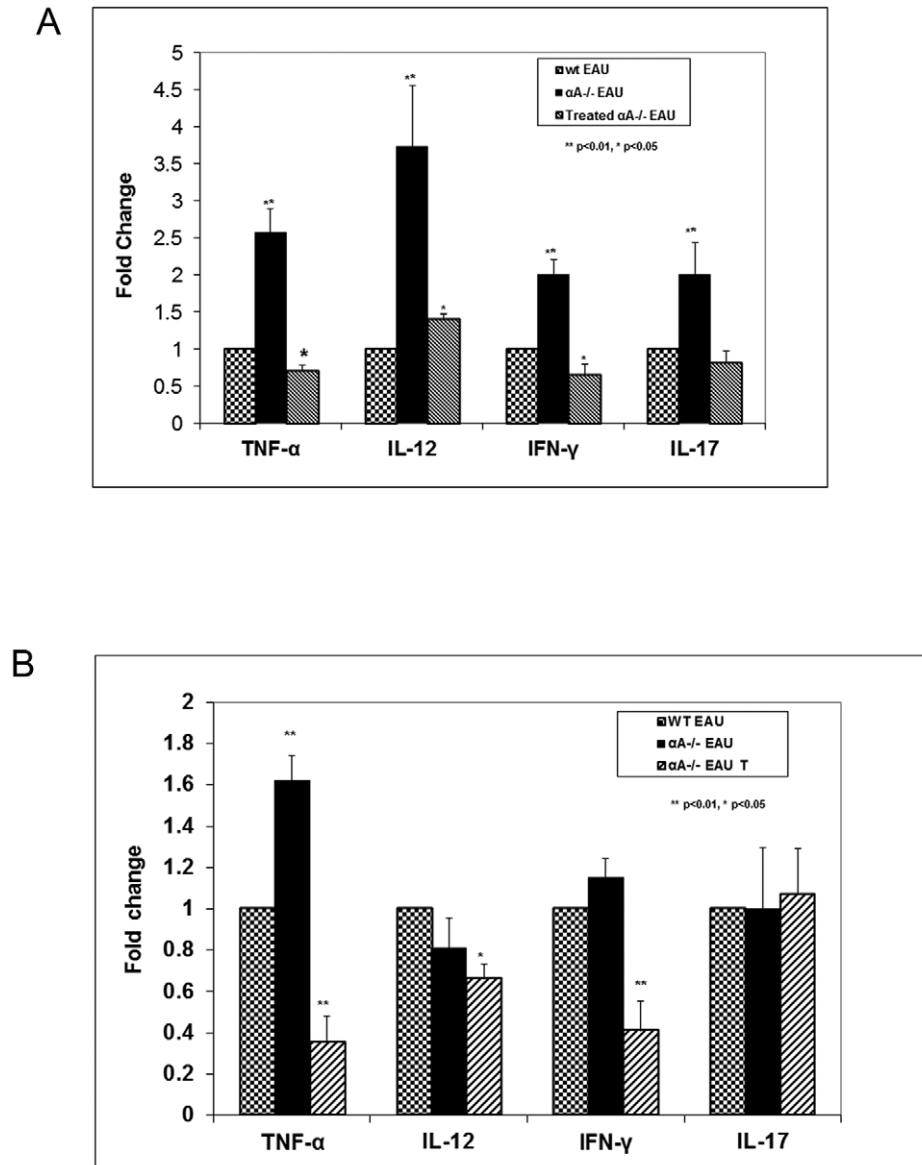

**Figure 4.  $\alpha$ A treatment has a significant impact on cytokine expression.** **A** and **B** are RT-PCR assays (A). Retinal Th1 cytokines (TNF- $\alpha$ , IL-12 and IFN- $\gamma$ ) and TH17 cytokine (IL-17) are up-regulated on day 21 in  $\alpha$ A $^{-/-}$  EAU mice compared to the WT EAU controls after a challenge with the IRBP peptide. With  $\alpha$ A administration (treated  $\alpha$ A $^{-/-}$  EAU) these cytokines show significantly reduced expression compared to the untreated  $\alpha$ A $^{-/-}$  EAU mice. (B). In the spleen of  $\alpha$ A $^{-/-}$  with EAU, the levels of TNF- $\alpha$  show an increase compared to the WT mice with EAU. IL-12 and IFN- $\gamma$  expression is similar in knockout mice and the WT mice.  $\alpha$ A administration reduces the levels of TNF- $\alpha$ , IL-12 and IFN- $\gamma$  in the spleen in  $\alpha$ A $^{-/-}$  mice compared to the untreated  $\alpha$ A $^{-/-}$  mice. Note that IL-17 remains unchanged in all three groups of mice. This is in contrast to increased expression of IL-17 in the retinas of  $\alpha$ A $^{-/-}$  EAU mice and its inhibition in animals treated with  $\alpha$ A (see A). doi:10.1371/journal.pone.0033582.g004

and their adapter proteins may have multiple consequences beyond their significant role in the initiation of adaptive immune response. For example TLR4 may have a role in initiating mitochondrial oxidative stress [20,32,33]. Thus inhibition of TLR4 expression upon  $\alpha$ A administration may negate increase of mitochondrial oxidative stress that may in turn contribute to photoreceptor protection (see Fig. 7), which connects with the observation of enhanced  $\alpha$ A in photoreceptor neurons. It is also important to note that  $\alpha$ A has been reported to be an endogenous ligand for TLR4 [34], which may also have important roles in regulation of the progenitor cell proliferation in the retina [35].

Taken together the observations detailed above on the protection of the retinal photoreceptor neurons by  $\alpha$ A administration in EAU point to functions of this small heat shock protein in immune regulation, beyond its anti-apoptotic properties [5,6]. Based on the data presented here and published literature (as discussed above) we have summarized possible  $\alpha$ A intervention points (Fig. 7). It is apparent that small heat shock proteins may follow specific routes or pathways in modulating the immune activities such as their specific role in immunosuppression [36], and for example  $\alpha$ B has been characterized as the target for the adaptive immune system [37]. The data in this manuscript demonstrates that intravenous administration of  $\alpha$ A to mice with EAU results in highly specific down regulation of innate as well as adaptive immune pathways, which seem to be organ specific (retina) suggesting that this small heat shock protein may prove of potential therapeutic benefit in the protection of photoreceptor neurons in uveitis and related T cell-mediated immune retina/uvea dysfunctions.

## Materials and Methods

Animal care and use was in compliance with institutional guidelines and with the Association for Research in Vision and Ophthalmology Statement for the Use of Animals in Ophthalmic and Vision Research.  $\alpha$ A and  $\alpha$ B were recombinant full length

human proteins purchased from Abcam (San Francisco, CA).  $\beta$ -crystallin and  $\gamma$ -crystallin fractions prepared from the bovine lens were purchased from Stressgen Bioreagents.

## Treatment of EAU animals with crystallins

EAU was induced in 8-week-old B10.RIII mice (Jackson Laboratory, Bar Harbor, ME) by subcutaneous injections of complete Freund's adjuvant containing Interphotoreceptor Retinol-binding Protein (IRBP) peptide [5]. On day 12 post injection (pi), the animals received 10 ug of recombinant  $\alpha$ A or 10 ug of recombinant  $\alpha$ B or 10 ug of  $\beta$ -crystallin or  $\gamma$ -crystallin in saline intravenously on alternate days. The mice were sacrificed on day 21, enucleated eyes were processed for histologic and immunohistochemical staining using rabbit anti-IRBP antibody (1:50) and Alexa-Fluor488-conjugated goat anti-rabbit IgG (1:200). Isotype controls and primary antibody replaced by PBS were used as the negative controls. The experiments were performed in triplicate. Retinal thickness at the juxtapapillary, equator and ora serrata areas was measured and analyzed by one way analysis of variance (ANOVA) using Tukey Kramer multiple comparisons test (data in Table S1).

Twelve  $\alpha$ A<sup>-/-</sup> mice were similarly immunized with an IRBP peptide [1] and divided in to two groups (six each). One group received 10 ug of recombinant  $\alpha$ A on alternate days starting from day 7 post immunization and the control group received saline. On day 14 after immunization, the mice were sacrificed and the eyes analyzed histologically. The experiments were performed in triplicate (three groups of six animals each).

## Apoptosis by TUNEL Assay

On day 21 post immunization, retinas from B10RIII EAU mice (Six each) treated with  $\alpha$ A, or  $\alpha$ B or saline were assayed for apoptosis employing the TUNEL assay (Roche Diagnostics, IN). DNase 1 (Roche Diagnostics) treated tissue was used as the positive control and 'no enzyme' as the negative control. Staining was performed in triplicate.

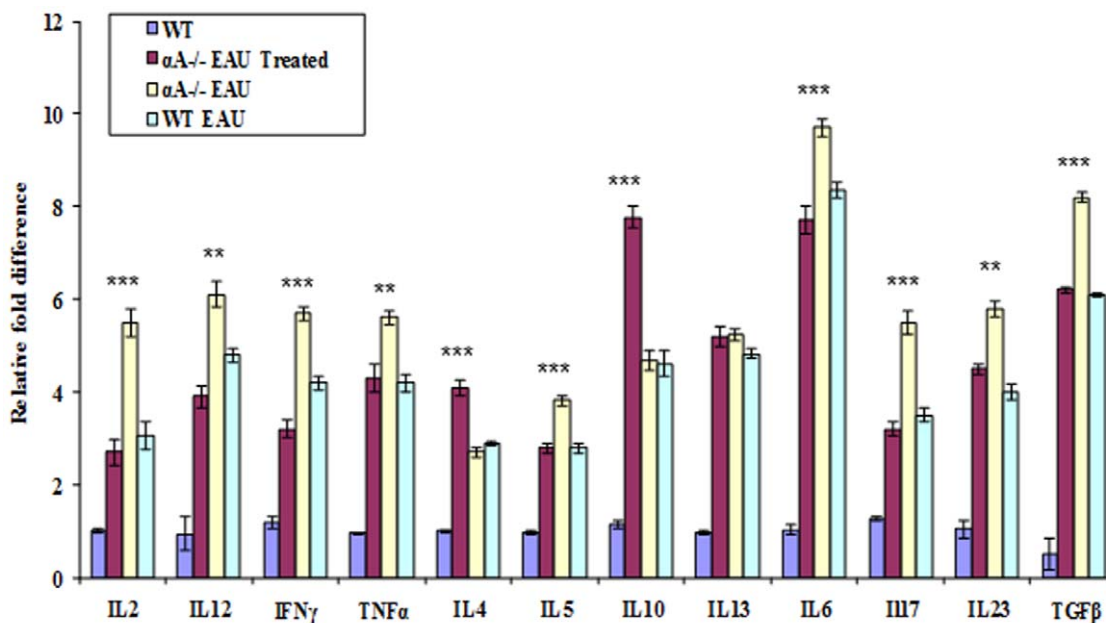

**Figure 5.  $\alpha$ A administration markedly lowers protein levels for various cytokines.** ELISA assays show decreased levels of IL-2, IL-12, IFN- $\gamma$  and TNF- $\alpha$  and Th17 cytokines IL-6, IL-17, IL-23 and TGF- $\beta$  in EAU mice treated with  $\alpha$ A, while Th2 cytokines IL-4 and IL-10 levels are increased. doi:10.1371/journal.pone.0033582.g005

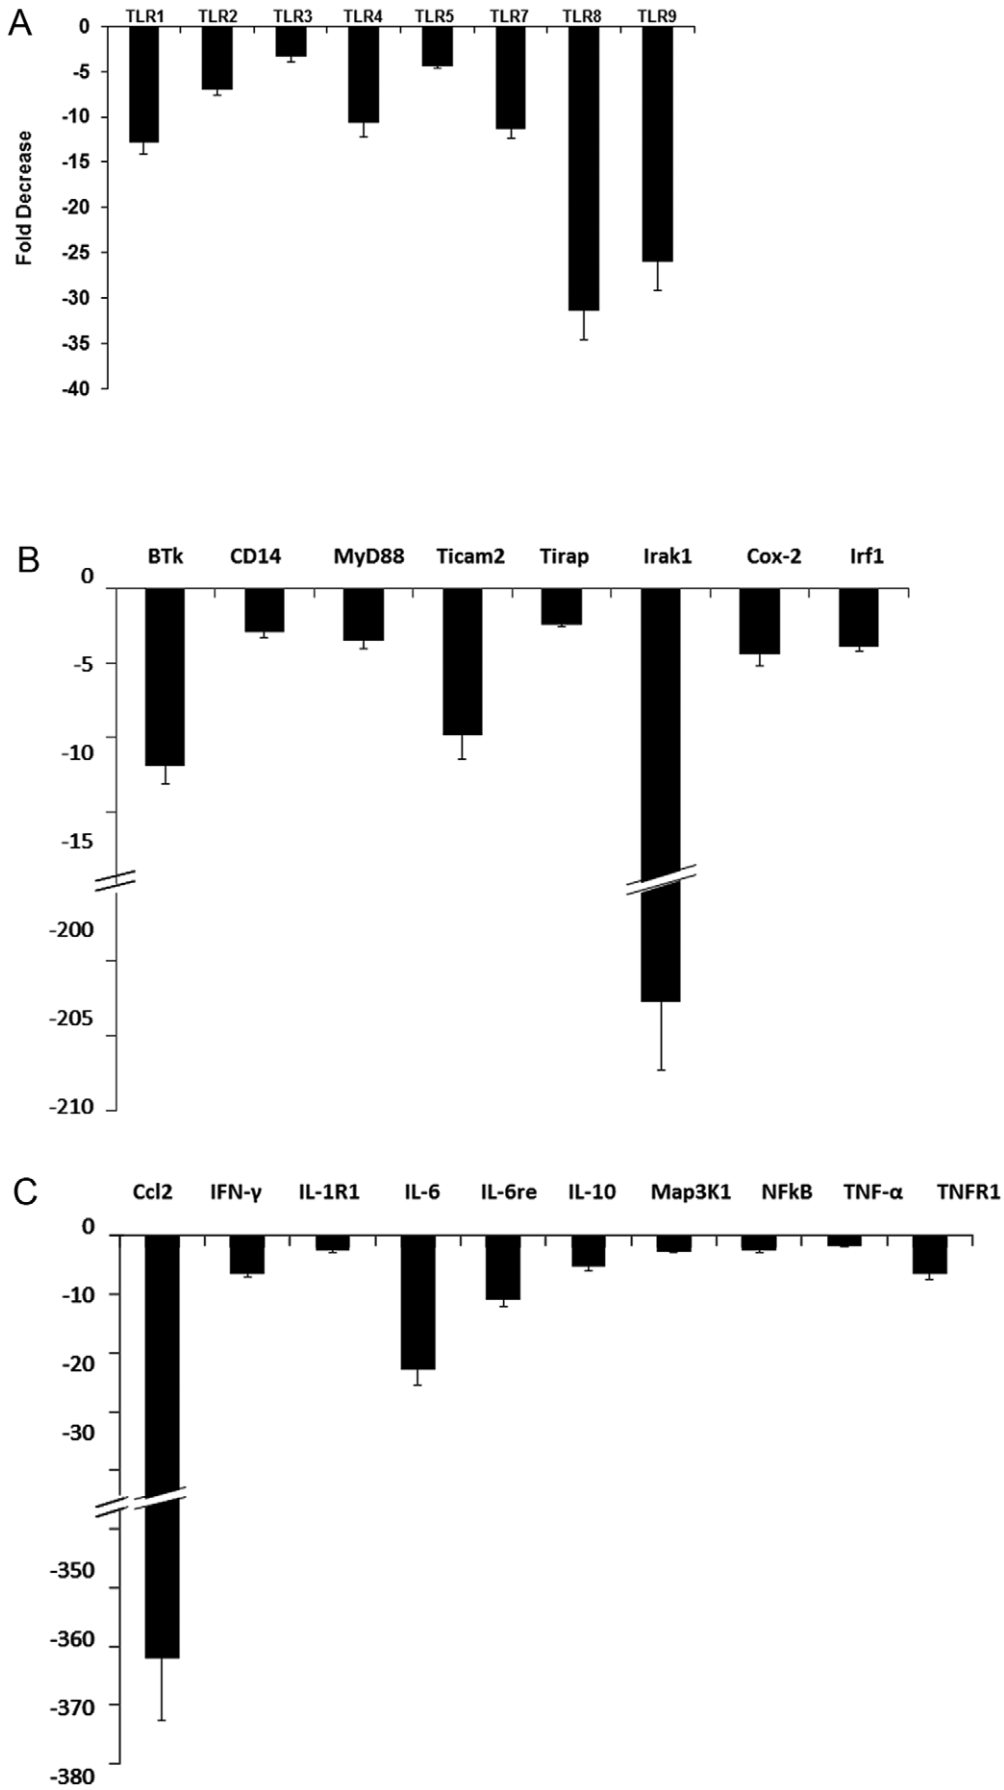

**Figure 6. Down regulation of gene activity associated with the innate immune pathways.** Commercial PCR arrays were used. Fold decrease was calculated by comparing data obtained with  $\alpha$ A<sup>-/-</sup> EAU without  $\alpha$ A treatment and  $\alpha$ A<sup>-/-</sup> EAU mice treated with  $\alpha$ A. A=Toll like receptors B=associated adaptive and signaling proteins and C=the NFKB pathway in  $\alpha$ A<sup>-/-</sup> mice with EAU treated with  $\alpha$ A. TLRs=Toll like receptors, MyD88: Myeloid differentiation primary response gene (88), Irak1=Interleukin-1 receptor-associated kinase 1, CD14=Cluster of differentiation 14, Ticam 2=TIR domain-containing adapter molecule 2, Tirap=toll-interleukin 1 receptor (TIR) domain containing adaptor protein, Cox-2=Cyclooxygenase-2, Irf-1=Interferon regulatory factor 1, IL-1R1=Interleukin 1 receptor, type I, Il-6re=IL6 responsive element, Map3K1=Mitogen-activated protein kinase kinase kinase 1, Nfkb=Nuclear factor kappa B, Ccl2=Chemokine (C-C motif) ligand 2, IFN- $\gamma$ =Interferon-gamma.  
doi:10.1371/journal.pone.0033582.g006

### Adaptive transfer

$\alpha$ A<sup>-/-</sup> and WT (129Sve) mice were immunized with IRBP peptide [32]. The lymph nodes and spleen cells were isolated at day 10 post-injection (pi) as described [4] (Caspi, 2003). They were then pooled and cultured in the presence of 10  $\mu$ g of IRBP peptide for 3 days. The cells were transferred into new flasks every day to remove adherent monocytes and macrophages. The cells were collected and washed. Live cells ( $10 \times 10^6$ ) were injected intraperitoneally into 6 week old Rag2<sup>-/-</sup> mice (Taconic Farms). The mice were also injected with 5  $\mu$ g of pertussis toxin intraperitoneally. On day 11 post transfer the mice were sacrificed and the eyes were studied histologically. The experiments were performed in triplicate.

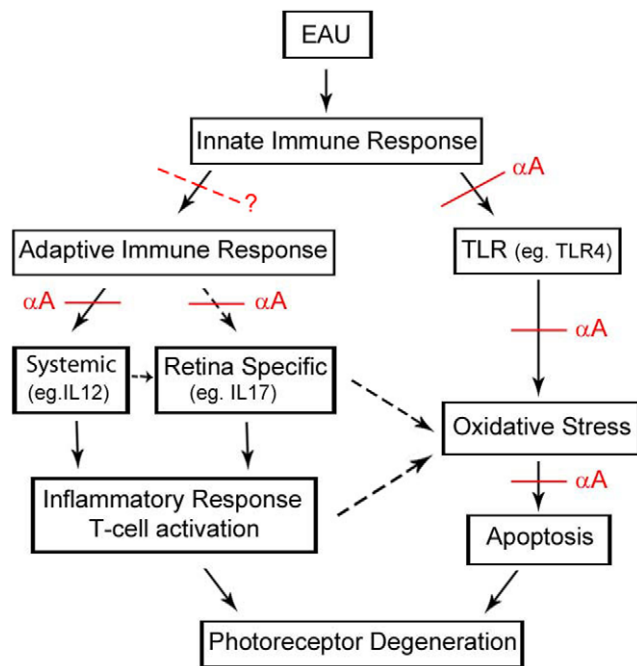

**Figure 7. A schematic showing possible pathways of  $\alpha$ A intervention that lead to the protection of the neuroretina in EAU.** These points of intervention have been deduced from the data presented in this manuscript and in the literature as discussed in the text. The oxidative stress in the mitochondria could have a common origin in the initial innate immune response as well as via the adaptive immune pathways. On the other hand this could also come from the pathological stress exacerbated by the adaptive immune system with systemic and retina-specific inputs (these possibilities have been indicated by a dotted black arrows), although the relationship between the two responses remains to be elucidated. The red dotted line with a question mark represents a speculation about the inhibition of the initiation of the adaptive immune response(s) after the initial activation of the innate immunity.  
doi:10.1371/journal.pone.0033582.g007

### Th1 and Th17 cytokines gene expression in $\alpha$ A crystallin treated EAU animals

Eighteen  $\alpha$ A<sup>-/-</sup> mice and six WT (129Sve) mice were immunized with IRBP peptide as above. Out of these, from day 12 onwards, a group of six mice were intravenously injected with 10  $\mu$ g of recombinant  $\alpha$ A, a second group of six with 10  $\mu$ g of recombinant  $\alpha$ B and a third group of six mice with saline, on alternate days. The mice were sacrificed on day 21; retinas were dissected out for RNA extraction (TriZol reagent, Invitrogen). The cDNAs were generated (Omniscrypt RT kit; Qiagen, Valencia, CA) and PCR was conducted with gene specific primers for TNF-alpha, IL-12, IFN gamma and IL-17 using the I-cycler (BioRad). Glyceraldehyde-3-phosphate dehydrogenase (GAPDH) was used as the normalizing gene as it did not show any significant changes in our experimental protocols. The PCR reactions for each gene in each experiment were performed in triplicate on each cDNA template, along with triplicate reactions for the housekeeping gene GAPDH. The threshold cycle (Ct) difference between the experimental and control groups, for each gene in each tissue, was calculated and normalized to GAPDH, and the increase (x-fold) in mRNA expression was determined by the  $2^{-\Delta\Delta Ct}$  method. Statistical analysis of  $\Delta\Delta Ct$  was performed with a Student's t-test for three independent samples, with significance set as  $P < 0.05$ , and compared between the different experimental groups.

### Determination of cytokines Th1 and Th17 protein in $\alpha$ A crystallin treated EAU animals

Eighteen  $\alpha$ A<sup>-/-</sup> mice and WT (129Sve) mice were immunized with IRBP peptide as above and injected intravenously with 10  $\mu$ g of recombinant  $\alpha$ A or  $\alpha$ B or saline from day 12 onwards on alternate days. The protein levels of the cytokines, Th1, Th2, Th17 from the retinas were determined by ELISA using a Multi-Analyte ELISA Array kit (SA Biosciences) according to manufacturer's instructions. Actual amount of protein in each assay is given in Table S3.

### Assessment of the expression of Toll like receptors and their signaling pathway genes in $\alpha$ A treated EAU animals

A group of 18 wild type mice and two groups of 18  $\alpha$ A<sup>-/-</sup> mice were immunized with IRBP peptide as described above. Out of the two groups of  $\alpha$ A<sup>-/-</sup> one group of 18 was injected intravenously with recombinant  $\alpha$ A from the day before immunization and all three groups of animals were sacrificed on day 7. The retinas were dissected for RNA extraction by the TriZol method (Invitrogen, Carlsbad, CA). RNA was quantified and checked for purity and integrity by microanalysis in an Agilent Bioanalyzer (Agilent Technologies, Santa Clara, CA). These RNAs were used to prepare cDNAs, which was used for PCR array analyses (SABiosciences, MD) for Toll like receptors and its signaling genes including adapters, interacting proteins and NFKB signaling genes. All the three experimental groups were compared to each other. The experiments were run in triplicate.

## Supporting Information

**Table S1 Morphometric analysis of the retinas after treatment with crystallins.** Morphometric analysis of retinal thickness in microns from the Juxtapapillary, Equator and Ora Serrata areas of EAU mice treated with  $\alpha$ A,  $\alpha$ B,  $\beta$  and Gamma crystallins and saline. (DOCX)

**Table S2 Cycle threshold values from qPCR analysis on mice retinas after alpha A crystalline treatment.** This table provides Cycle threshold values (an average of three determinations) for the data (fold changes in expression) shown in Figures 3A and 3B. mRNA was isolated from the retina and spleen. WT EAU=Wild type mice with EAU,  $\alpha$ A-/- EAU= $\alpha$ A knockout mice with EAU, Treated  $\alpha$ A-/- EAU= $\alpha$ A-/- mice with EAU treated with  $\alpha$ A intravenous injections. Details are given under Materials and Methods. (DOCX)

## References

- Du L, Kijlstra A, Yang P (2009) Immune response genes in uveitis. *Ocul Immunol Inflamm* 17: 249–256.
- Forrester JV, Huitinga I, Lumsden L, Dijkstra CD (1998) Marrow-derived activated macrophages are required during the effector phase of experimental autoimmune uveoretinitis in rats. *Curr Eye Res* 17: 426–437.
- Scirocco A, Matarrese P, Petitta C, Cicenia A, Ascione B, et al. (2010) Exposure of Toll-like receptors 4 to bacterial lipopolysaccharide (LPS) impairs human colonic smooth muscle cell function. *J Cell Physiol* 223: 442–450.
- Caspi RR (2003) Experimental autoimmune uveoretinitis in the rat and mouse. *Curr Protoc Immunol* Chapter 15: Unit 15 16.
- Rao NA, Saraswathy S, Wu GS, Katselis GS, Wawrousek EF, et al. (2008) Elevated retina-specific expression of the small heat shock protein, alphaA-crystallin, is associated with photoreceptor protection in experimental uveitis. *Invest Ophthalmol Vis Sci* 49: 1161–1171.
- Andley UP (2007) Crystallins in the eye: Function and pathology. *Prog Retin Eye Res* 26: 78–98.
- Brady JP, Garland D, Douglas-Tabor Y, Robison WG, Jr., Groome A, et al. (1997) Targeted disruption of the mouse alpha A-crystallin gene induces cataract and cytoplasmic inclusion bodies containing the small heat shock protein alpha B-crystallin. *Proc Natl Acad Sci U S A* 94: 884–889.
- Romi F, Helgeland G, Gilhus NE (2011) Heat-shock proteins in clinical neurology. *European neurology* 66: 65–69.
- Masilamoni JG, Jesudason EP, Baben B, Jebaraj CE, Dhandayathapani S, et al. (2006) Molecular chaperone alpha-crystallin prevents detrimental effects of neuroinflammation. *Biochimica et biophysica acta* 1762: 284–293.
- Masilamoni JG, Jesudason EP, Bharathi SN, Jayakumar R (2005) The protective effect of alpha-crystallin against acute inflammation in mice. *Biochimica et biophysica acta* 1740: 411–420.
- Masilamoni JG, Vignesh S, Kirubakaran R, Jesudason EP, Jayakumar R (2005) The neuroprotective efficacy of alpha-crystallin against acute inflammation in mice. *Brain research bulletin* 67: 235–241.
- Ousman SS, Tomooka BH, van Noort JM, Wawrousek EF, O'Connor KC, et al. (2007) Protective and therapeutic role for alphaB-crystallin in autoimmune demyelination. *Nature* 448: 474–479.
- Chabas D, Baranzini SE, Mitchell D, Bernard CC, Rittling SR, et al. (2001) The influence of the proinflammatory cytokine, osteopontin, on autoimmune demyelinating disease. *Science* 294: 1731–1735.
- Bhat SP (2003) Crystallins, genes and cataract. *Prog Drug Res* 60: 205–262.
- Somasundaram T, Bhat SP (2000) Canonical heat shock element in the alpha B-crystallin gene shows tissue-specific and developmentally controlled interactions with heat shock factor. *J Biol Chem* 275: 17154–17159.
- Larson T, Nussenblatt RB, Sen HN (2011) Emerging drugs for uveitis. *Expert opinion on emerging drugs* 16: 309–322.
- Kato K, Shinohara H, Kurobe N, Goto S, Inaguma Y, et al. (1991) Immunoreactive alpha A crystallin in rat non-lenticular tissues detected with a sensitive immunoassay method. *Biochimica et biophysica acta* 1080: 173–180.
- Srinivasan AN, Nagineni CN, Bhat SP (1992) alpha A-crystallin is expressed in non-ocular tissues. *The Journal of biological chemistry* 267: 23337–23341.
- Saraswathy S, Rao NA (2009) Mitochondrial proteomics in experimental autoimmune uveitis oxidative stress. *Investigative ophthalmology & visual science* 50: 5559–5566.
- Hohki S, Ohguro N, Haruta H, Nakai K, Terabe F, et al. (2010) Blockade of interleukin-6 signaling suppresses experimental autoimmune uveoretinitis by the inhibition of inflammatory Th17 responses. *Exp Eye Res* 91: 162–170.
- Johnson BJ, Le TT, Dobbins CA, Banovic T, Howard CB, et al. (2005) Heat shock protein 10 inhibits lipopolysaccharide-induced inflammatory mediator production. *The Journal of biological chemistry* 280: 4037–4047.
- Kulkarni R, Behboudi S, Sharif S (2010) Insights into the role of Toll-like receptors in modulation of T cell responses. *Cell Tissue Res*.
- Liu G, Zhang L, Zhao Y (2010) Modulation of immune responses through direct activation of Toll-like receptors to T cells. *Clin Exp Immunol* 160: 168–175.
- Liu G, Zhao Y (2007) Toll-like receptors and immune regulation: their direct and indirect modulation on regulatory CD4+ CD25+ T cells. *Immunology* 122: 149–156.
- Yoshimura T, Sonoda KH, Ohguro N, Ohsugi Y, Ishibashi T, et al. (2009) Involvement of Th17 cells and the effect of anti-IL-6 therapy in autoimmune uveitis. *Rheumatology (Oxford)* 48: 347–354.
- Metzger DW (2010) Interleukin-12 as an adjuvant for induction of protective antibody responses. *Cytokine* 52: 102–107.
- Yoshimura T, Sonoda KH, Miyazaki Y, Iwakura Y, Ishibashi T, et al. (2008) Differential roles for IFN-gamma and IL-17 in experimental autoimmune uveoretinitis. *International immunology* 20: 209–214.
- Keino H, Watanabe T, Sato Y, Okada AA (2010) Anti-inflammatory effect of retinoic acid on experimental autoimmune uveoretinitis. *The British journal of ophthalmology* 94: 802–807.
- Akira S, Yamamoto M, Takeda K (2003) Role of adapters in Toll-like receptor signalling. *Biochem Soc Trans* 31: 637–642.
- Fan H, Li L, Zhang X, Liu Y, Yang C, et al. (2009) Oxymatrine downregulates TLR4, TLR2, MyD88, and NF-kappaB and protects rat brains against focal ischemia. *Mediators Inflamm* 2009: 704706.
- Feng Y, Zou L, Si R, Nagasaka Y, Chao W (2010) Bone marrow MyD88 signaling modulates neutrophil function and ischemic myocardial injury. *Am J Physiol Cell Physiol* 299: C760–769.
- Saraswathy S, Nguyen AM, Rao NA (2010) The role of TLR4 in photoreceptor {alpha}a crystallin upregulation during early experimental autoimmune uveitis. *Invest Ophthalmol Vis Sci* 51: 3680–3686.
- Suliman HB, Welty-Wolf KE, Carraway MS, Schwartz DA, Hollingsworth JW, et al. (2005) Toll-like receptor 4 mediates mitochondrial DNA damage and biogenic responses after heat-inactivated *E. coli*. *FASEB J* 19: 1531–1533.
- Roelofs MF, Boelens WC, Joosten LA, Abdollahi-Roodsaz S, Geurts J, et al. (2006) Identification of small heat shock protein B8 (HSP22) as a novel TLR4 ligand and potential involvement in the pathogenesis of rheumatoid arthritis. *Journal of immunology* 176: 7021–7027.
- Shechter R, Ronen A, Rolls A, London A, Bakalash S, et al. (2008) Toll-like receptor 4 restricts retinal progenitor cell proliferation. *The Journal of cell biology* 183: 393–400.
- Henderson B, Pockley AG (2010) Molecular chaperones and protein-folding catalysts as intercellular signaling regulators in immunity and inflammation. *Journal of leukocyte biology* 88: 445–462.
- van Noort JM, Bsibi M, Gerritsen WH, van der Valk P, Bajramovic JJ, et al. (2010) AlphaB-crystallin is a target for adaptive immune responses and a trigger of innate responses in preactive multiple sclerosis lesions. *Journal of neuropathology and experimental neurology* 69: 694–703.

**Table S3 Analysis of protein levels of Th1/Th2/Th17 cytokines by ELISA.** Data showing the cytokine levels in pg/ml in the retina of wild type mice (WT), WT mice with EAU (WT EAU),  $\alpha$ A -/- mice with EAU ( $\alpha$ A-/- EAU) and,  $\alpha$ A -/- mice with EAU treated with  $\alpha$ A protein (Treated  $\alpha$ A-/- EAU). Multi-Multi-Analyte ELIS Array Kit (QIAGEN) analyzes a panel of 12 cytokines involved in T helper cell biology using a conventional ELISA protocol all at once under uniform conditions. For the ELISA assay, we used 12 retinas (6 mice) as one sample. The protein was extracted from these samples and from the total 600 ul of the protein; 50 ul of the protein sample (40 ug) was added to each well containing each cytokine. This was done in triplicate. (See Materials and Methods for details). (DOCX)

## Author Contributions

Conceived and designed the experiments: SS NR GP SB. Performed the experiments: SS. Analyzed the data: SS NR GP SB. Contributed reagents/materials/analysis tools: NR SS. Wrote the paper: SS NR SB.
